# Supplementary material
Source: PubMed Central journal article supplement (PMC4658211)

**Figure S2. Predicted vs. observed mortality probability for the comprehensive risk score: Validation cohort. Circles denote deciles. Correlation coefficient is 0.98 for 3 month and 0.99 for 6 month.**

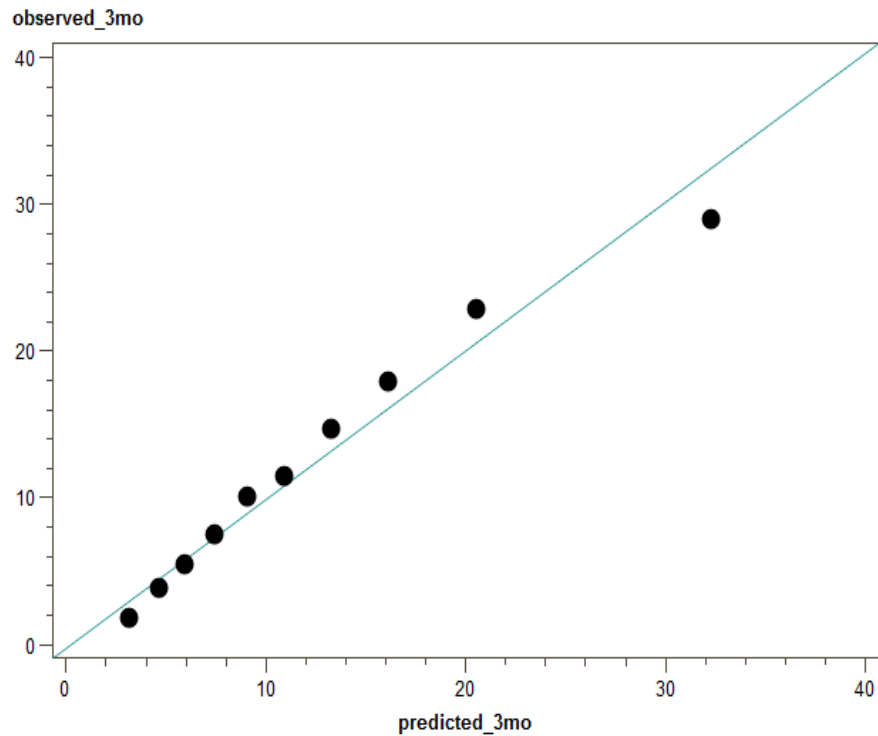

Supplement: NIHMS699143-supplement-2.pdf [file NIHMS699143-supplement-2.pdf]
