# Supplementary material
Source: PubMed Central journal article supplement (PMC4658211)
Supplement: NIHMS699143-supplement-3.pdf [file NIHMS699143-supplement-3.pdf]

### Item S1: Mortality probability calculators

The risk of mortality at 3 and 6 months can be estimated from the following formula:

1. Using the comprehensive model

Probability (dying within 3 months) =  $1/[1+\exp(-xb)]$ , with  $xb = -5.0985 + I(\text{male}) * 0.1647 + (\text{Age in years}) * 0.0351 + I(\text{white}) * 0.2766 + I(\text{catheter}) * 0.6111 + I(\text{no or late nephrology care}) * 0.2559 + (\text{albumin in g/dl}) * (-0.2821) + (\text{serum creatinine in mg/dl}) * (-0.0312) + I(\text{need assistance}) * 0.3587 + I(\text{nursing home}) * 0.5870 + I(\text{cancer}) * 0.3931 + I(\text{PVD}) * 0.1292 + I(\text{alcohol problem}) * 0.5059 + I(\text{CHF}) * 0.2861 + (\text{\# of hospitalizations}) * 0.0912$ . Here  $I(x)$  is an indicator function, =1 if  $x$  is true; 0 otherwise, and all other variables are continuous.

Probability (dying within 6 months) =  $1/[1+\exp(-xb)]$ , with  $xb = -4.7498 + I(\text{male}) * 0.1558 + (\text{Age in years}) * 0.0381 + I(\text{white}) * 0.2912 + I(\text{catheter}) * 0.5694 + I(\text{no or late nephrology care}) * 0.2332 + (\text{albumin in g/dl}) * (-0.2555) + (\text{serum creatinine in mg/dl}) * (-0.0380) + I(\text{need assistance}) * 0.3745 + I(\text{nursing home}) * 0.5950 + I(\text{cancer}) * 0.4341 + I(\text{PVD}) * 0.1773 + I(\text{alcohol problem}) * 0.4635 + I(\text{CHF}) * 0.3217 + (\text{\# of hospitalizations}) * 0.0992$ .

2. Using the simple model

Probability (dying within 3 months) =  $1/[1+\exp(-xb)]$ , with  $xb = -3.4003 + I(\text{Age in 70-74}) * 0.2404 + I(\text{Age in 75-79}) * 0.3968 + I(\text{Age in 80-84}) * 0.5533 + I(\text{Age in 85-89}) * 0.7356 + I(\text{Age} \geq 90) * 1.044 + I(\text{albumin} < 3.5 \text{g/dl}) * 0.5571 + I(\text{album unavailable}) * 0.5342 + I(\text{need assistance}) * 0.3878 + I(\text{nursing home}) * 0.6722 + I(\text{cancer}) * 0.4474 + I(\text{CHF}) * 0.3450 + I(\text{hospitalized?}) * 0.3353$ , where  $I$  is an indicator function.

Probability (dying within 6 months) =  $1/[1+\exp(-xb)]$ , with  $xb = -2.7737 + I(\text{Age in 70-74}) * 0.2071 + I(\text{Age in 75-79}) * 0.4030 + I(\text{Age in 80-84}) * 0.5686 + I(\text{Age in 85-89}) * 0.7857 + I(\text{Age} \geq 90) * 1.0711 + I(\text{albumin} < 3.5 \text{g/dl}) * 0.5043 + I(\text{album unavailable}) * 0.4666 + I(\text{need assistance}) * 0.4028 + I(\text{nursing home}) * 0.6750 + I(\text{cancer}) * 0.4835 + I(\text{CHF}) * 0.3927 + I(\text{hospitalized?}) * 0.3624$ .
