# Supplementary material
Source: PubMed Central journal article supplement (PMC4658211)
Supplement: NIHMS699143-supplement-4.pdf [file NIHMS699143-supplement-4.pdf]

**Table S1.** Summary of patient characteristics: development and validation cohorts

| Factor                                                                        | Development cohort (N=52,796)<br>% or mean (SD) [IQR] | Validation cohort (N=16,645)<br>% or mean (SD) [IQR] |
|-------------------------------------------------------------------------------|-------------------------------------------------------|------------------------------------------------------|
| Age (year)                                                                    | 76.9 (6.5) [71-82]                                    | 76.8 (6.5) [71-82]                                   |
| Sex – Female                                                                  | 46.2                                                  | 46.9                                                 |
| Race – White                                                                  | 75.3                                                  | 75.0                                                 |
| Black                                                                         | 20.0                                                  | 20.0                                                 |
| Other                                                                         | 4.7                                                   | 5.0                                                  |
| Ethnicity - Hispanic                                                          | 8.2                                                   | 8.2                                                  |
| Urban (vs. Rural)                                                             | 83.2                                                  | 83.0                                                 |
| Dialysis modality – hemodialysis                                              | 95.8                                                  | 95.0                                                 |
| Access at 1 <sup>st</sup> dialysis – catheter only                            | 60.6                                                  | 59.4                                                 |
| Patient informed regarding transplant                                         | 66.3                                                  | 67.7                                                 |
| Time between 1 <sup>st</sup> evaluation by nephrologist and start of dialysis |                                                       |                                                      |
| – Never                                                                       | 17.0                                                  | 18.9                                                 |
| 0 < to ≤ 4 month                                                              | 22.2                                                  | 20.9                                                 |
| 4 < to ≤ 12 months                                                            | 12.9                                                  | 13.2                                                 |
| 12 < to ≤ 24 months                                                           | 47.9                                                  | 47.0                                                 |
| BMI                                                                           | 28.0 (7.0) [23.2-31.4]                                | 28.1 (7.0) [23.3-31.7]                               |
| Albumin (g/dl)*                                                               | 3.2 (0.66) [2.7-3.6]                                  | 3.2 (0.66) [2.7-3.6]                                 |
| Hemoglobin (g/dl)*                                                            | 10.0 (1.5) [9.0-10.9]                                 | 9.9 (1.5) [8.9-10.8]                                 |
| Creatinine (mg/dl)                                                            | 5.3 (2.3) [3.8-6.2]                                   | 5.3 (2.3) [3.8-6.2]                                  |
| GFR (ml/min/1.73 m <sup>2</sup> )                                             | 12.2 (5.1) [8.5-14.9]                                 | 12.2 (5.1) [8.5-15.0]                                |
| Current smoker                                                                | 3.5                                                   | 3.7                                                  |
| Alcohol problem                                                               | 4.9                                                   | 4.9                                                  |
| Drug dependence                                                               | 0.1                                                   | 0.1                                                  |
| Need assistance with daily living                                             | 21.1                                                  | 21.9                                                 |
| Institutionalized                                                             | 12.1                                                  | 12.7                                                 |
| Cancer                                                                        | 14.1                                                  | 14.1                                                 |
| COPD                                                                          | 28.0                                                  | 28.5                                                 |
| PVD                                                                           | 27.5                                                  | 28.1                                                 |
| Diabetes                                                                      | 58.4                                                  | 59.7                                                 |
| Depression                                                                    | 10.0                                                  | 10.9                                                 |
| Dementia                                                                      | 5.9                                                   | 5.8                                                  |
| Congestive heart failure                                                      | 52.5                                                  | 52.7                                                 |
| Coronary heart disease                                                        | 51.6                                                  | 52.1                                                 |
| Stroke                                                                        | 16.9                                                  | 17.2                                                 |
| AIDS                                                                          | 0.1                                                   | 0.1                                                  |
| Charlson comorbidity index                                                    | 7.7 (3.5) [5-10]                                      | 7.7 (3.5) [5-10]                                     |
| # of hospitalization                                                          | 1.0 (1.3) [0-2]                                       | 1.0 (1.3) [0-2]                                      |
| Total hospital days                                                           | 8.1 (13.9) [0-11]                                     | 8.4 (14.3) [0-11]                                    |
| # of ER visits                                                                | 1.4 (1.7) [0-2]                                       | 1.4 (1.7) [0-2]                                      |
| Mortality – within 3 months                                                   | 12.3                                                  | 12.5                                                 |
| within 6 months                                                               | 20.3                                                  | 20.4                                                 |

\*About 75% and 91% patients had complete (i.e., nonmissing) data on albumin and hemoglobin, respectively, but summary statistics were unchanged without or with imputation. All other variables are complete. Health resource utilization (hospitalizations and ER visits) based on 6 months prior to dialysis initiation.
