# Supplementary material
Source: PubMed Central journal article supplement (PMC4658211)
Supplement: NIHMS699143-supplement-5.pdf [file NIHMS699143-supplement-5.pdf]

**Table S2.** Multiple regression for the comprehensive model for 3-month mortality without imputing albumin in the development cohort (N=39,622, 2<sup>nd</sup> column) and with imputation in the validation cohort (N=16,645, last column)

| Predictors                                                            | OR (95% CI)      | OR (95% CI)      |
|-----------------------------------------------------------------------|------------------|------------------|
| Age (per 1 year)                                                      | 1.04 (1.03-1.04) | 1.04 (1.03-1.05) |
| Male                                                                  | 1.18 (1.10-1.26) | 1.16 (1.05-1.28) |
| White                                                                 | 1.28 (1.18-1.38) | 1.33 (1.18-1.51) |
| Catheter user                                                         | 1.75 (1.62-1.89) | 1.90 (1.69-2.13) |
| No or late nephrology care before dialysis (4 months or less in care) | 1.33 (1.24-1.41) | 1.33 (1.20-1.46) |
| Albumin (per 1 g/dl)                                                  | 0.67 (0.64-0.71) | 0.80 (0.74-0.86) |
| Serum Creatinine (per 1 mg/dl)                                        | 0.97 (0.95-0.98) | 0.96 (0.94-0.99) |
| Needs assistance in daily living or walking                           | 1.42 (1.32-1.54) | 1.43 (1.27-1.61) |
| Living in nursing home                                                | 1.67 (1.53-1.83) | 1.64 (1.43-1.88) |
| Cancer                                                                | 1.52 (1.40-1.65) | 1.53 (1.35-1.73) |
| Peripheral vascular disease                                           | 1.14 (1.06-1.22) | 1.12 (1.01-1.25) |
| Alcohol problem                                                       | 1.57 (1.39-1.78) | 1.52 (1.26-1.83) |
| Congestive heart failure                                              | 1.37 (1.28-1.47) | 1.54 (1.39-1.72) |
| # of hospitalizations (during 6 months prior to dialysis)             | 1.09 (1.06-1.11) | 1.09 (1.05-1.13) |
