# Supplementary material
Source: PubMed Central journal article supplement (PMC4658211)
Supplement: NIHMS699143-supplement-6.pdf [file NIHMS699143-supplement-6.pdf]

**Table S3.** Diagnostic characteristics of the comprehensive and simple Predictive Risk Scores using different cutpoints: Validation cohort (N=16,645)

| Cutpoint                                               | % $\geq$ cutpoint | Sensitivity | Specificity | PPV | NPV |
|--------------------------------------------------------|-------------------|-------------|-------------|-----|-----|
| Probability of death from the comprehensive risk score |                   |             |             |     |     |
| $\geq 0.18$                                            | 20                | 41          | 83          | 26  | 91  |
| $\geq 0.15$                                            | 30                | 56          | 74          | 23  | 92  |
| $\geq 0.12$                                            | 40                | 68          | 64          | 21  | 93  |
| $\geq 0.10$                                            | 50                | 77          | 54          | 19  | 94  |
| Risk score from the simple risk score                  |                   |             |             |     |     |
| $\geq 5$                                               | 15                | 30          | 87          | 25  | 90  |
| $\geq 4$                                               | 35                | 58          | 68          | 21  | 92  |
| $\geq 3$                                               | 62                | 83          | 42          | 17  | 95  |
