# Supplementary material
Source: PubMed Central journal article supplement (PMC4658211)
Supplement: NIHMS699143-supplement-7.pdf [file NIHMS699143-supplement-7.pdf]

**Table S4.** Summary of available patient characteristics at baseline between study cohort and those excluded due to missing Medicare history.

| Factor                                             | Study patient cohort with 2-year previous Medicare history (N=69,411) % or mean (SD) [IQR] | Population excluded from the study with missing 2-year Medicare history (N=22,899) % or mean (SD) [IQR] |
|----------------------------------------------------|--------------------------------------------------------------------------------------------|---------------------------------------------------------------------------------------------------------|
| Age (year)                                         | 76.9(6.5) [71-82]                                                                          | 75.9(6.4)[71-80]                                                                                        |
| Sex – Female                                       | 46.4                                                                                       | 42.5                                                                                                    |
| Race – White                                       | 75.3                                                                                       | 70.9                                                                                                    |
| Black                                              | 20.0                                                                                       | 21.9                                                                                                    |
| Other                                              | 4.7                                                                                        | 7.2                                                                                                     |
| Ethnicity - Hispanic                               | 8.2                                                                                        | 14.3                                                                                                    |
| Dialysis modality – hemodialysis                   | 95.6                                                                                       | 95.3                                                                                                    |
| Access at 1 <sup>st</sup> dialysis – catheter only | 60.3                                                                                       | 60.3                                                                                                    |
| Patient informed regarding transplant              | 66.6                                                                                       | 69.5                                                                                                    |
| BMI                                                | 28.0(7.0)[23.2-31.5]                                                                       | 27.6(6.8)[23.0-31]                                                                                      |
| Albumin (g/dl)*                                    | 3.2(0.7)[2.7-3.6]                                                                          | 3.2(0.7)[2.8-3.7]                                                                                       |
| Hemoglobin (g/dl)*                                 | 10.0(1.5)[9.0-10.9]                                                                        | 9.9(1.5)[9.0-10.9]                                                                                      |
| Creatinine (mg/dl)                                 | 5.3(2.3)[3.8-6.2]                                                                          | 5.7(2.7)[4.0-6.7]                                                                                       |
| GFR (ml/min/1.73 m2)                               | 12.2(5.1)[8.5-14.9]                                                                        | 11.6(5.0)[8.1-14.3]                                                                                     |
| Current smoker                                     | 3.5                                                                                        | 3.8                                                                                                     |
| Drug dependence                                    | 0.1                                                                                        | 0.2                                                                                                     |
| Need assistance with daily living                  | 21.3                                                                                       | 17.7                                                                                                    |
| Institutionalized                                  | 12.2                                                                                       | 9.4                                                                                                     |

\*About 75% and 91% patients in 1<sup>st</sup> column and 74% and 91% in 2<sup>nd</sup> column had complete (i.e., nonmissing) data on albumin and hemoglobin, respectively. All other variables are complete.
