# Supplementary material
Source: PubMed Central journal article supplement (PMC4658211)

Figure S1. Receiver operating characteristic curves for different models: validation cohort.

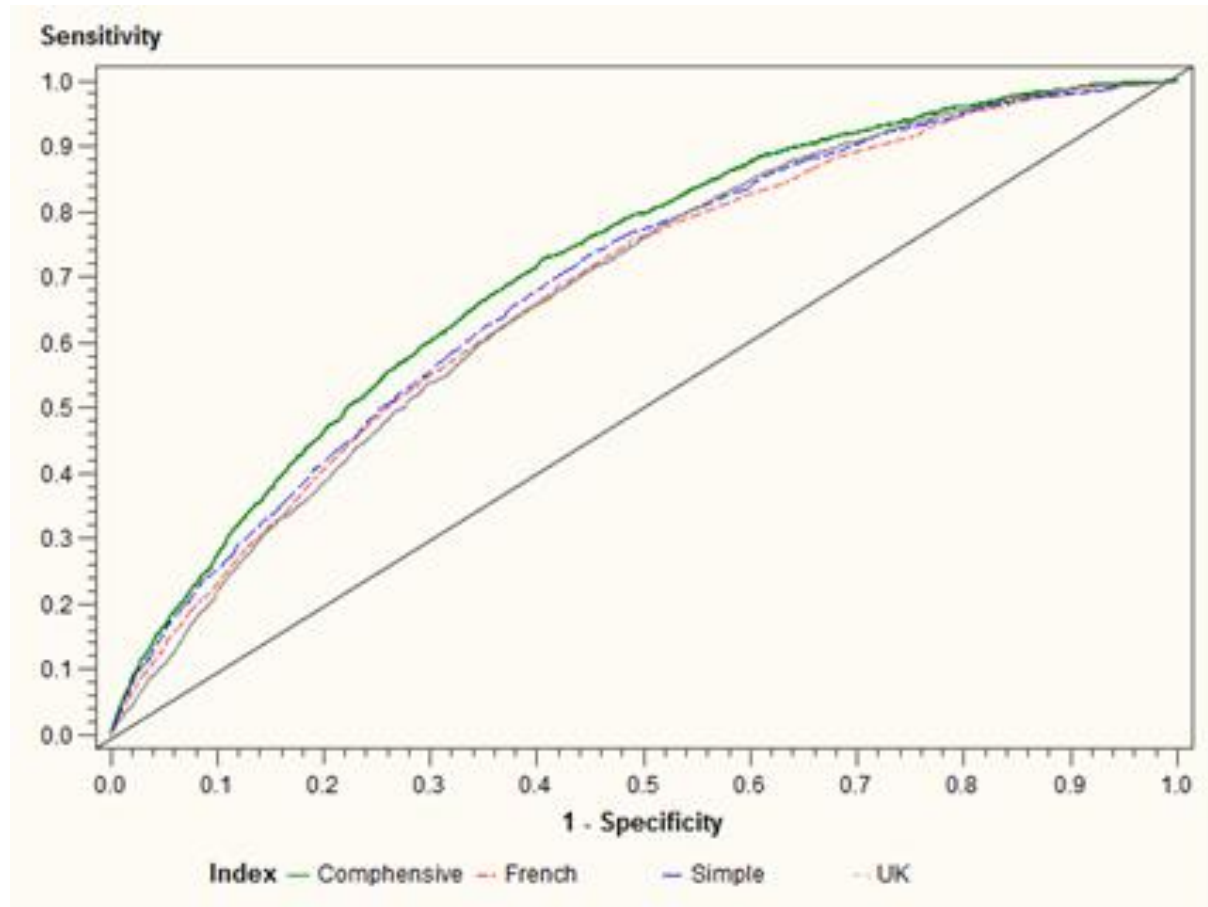

Supplement: NIHMS699143-supplement-1.pdf [file NIHMS699143-supplement-1.pdf]
